# Supplementary material
Source: PubMed Central journal article supplement (PMC1458964)

# Supplemental Figure

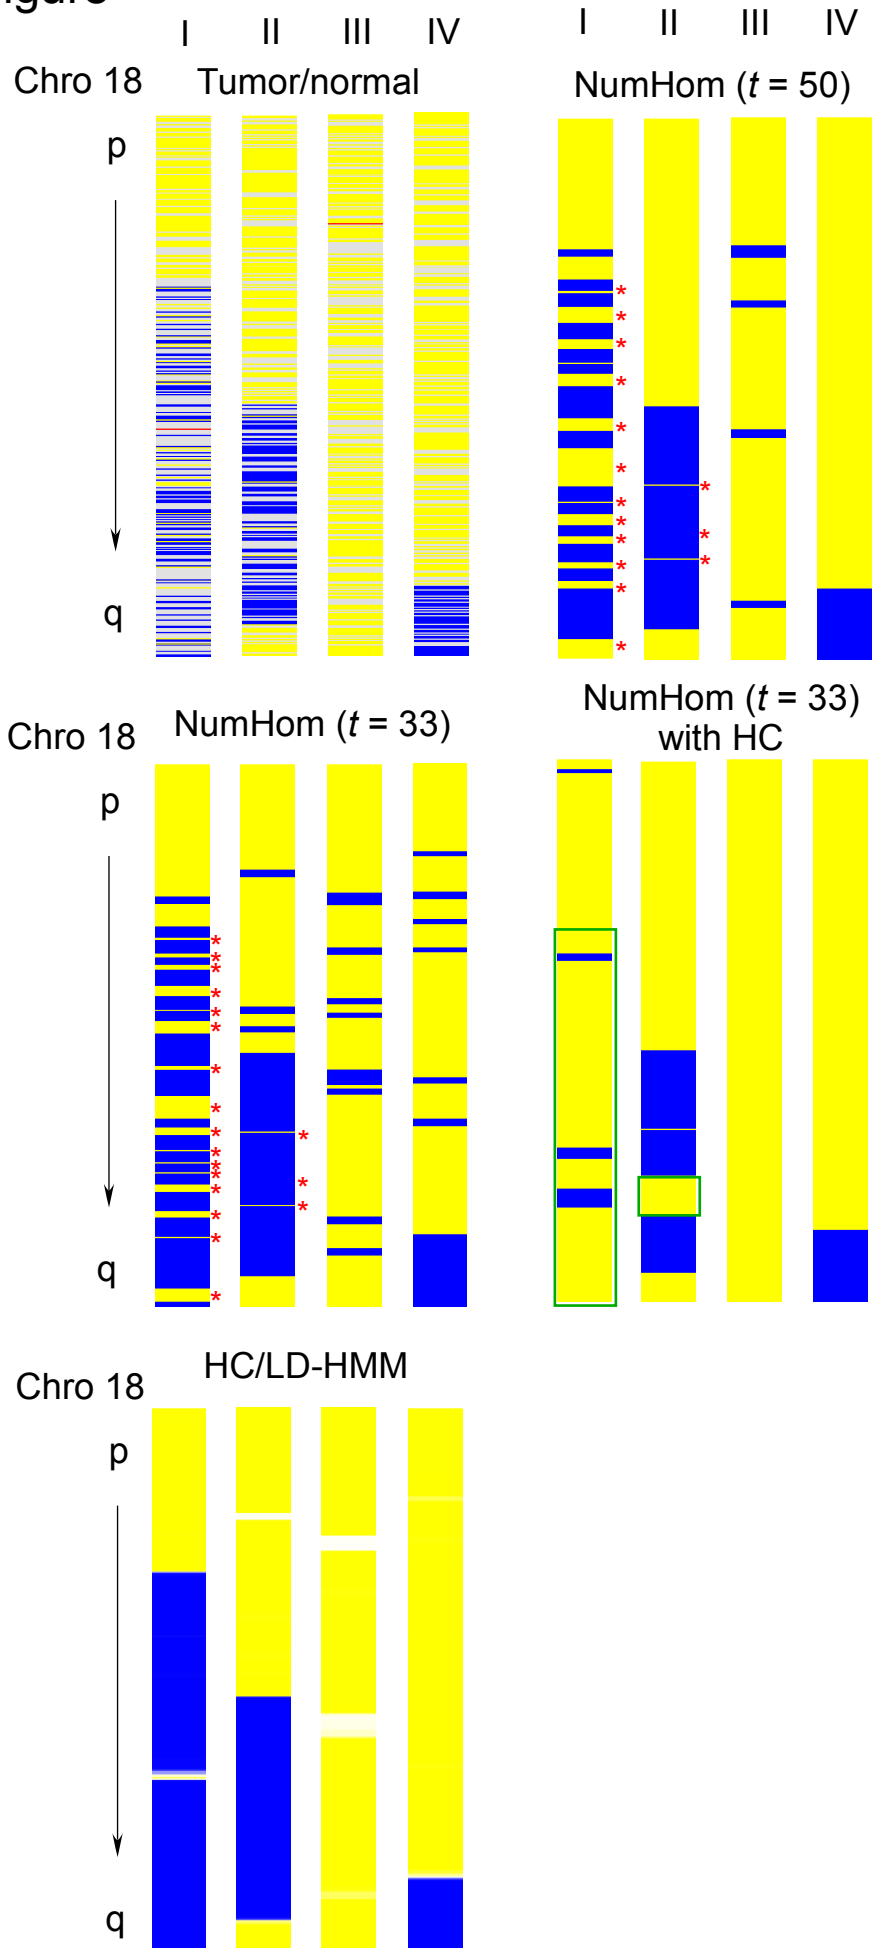

Supplement: pcbi.0020041.sg001.pdf [file pcbi.0020041.sg001.pdf]
